# Supplementary material for: Differences in risk profile associated with varicose veins and chronic venous insufficiency – results from the Bonn Vein Study 1
Source: Atypon-hosted journal article supplement (doi:10.1024/0301-1526/a001115), 2024-03-01
Supplement: 0301-1526_a001115_esm1.pdf [file 0301-1526_a001115_esm1.pdf]

## Electronic supplementary material

**Table 1.** Multivariate estimation of the prevalence ratio (PR) for VV and number of pregnancies, oral contraceptives, pill years and hormone replacement therapy (HRT) in the female population

| Risk factor                              | Control Group 1 |              | VV         |              | Raw estimate |                  | Adjust. estimate |                  |
|------------------------------------------|-----------------|--------------|------------|--------------|--------------|------------------|------------------|------------------|
|                                          | N<br>985        | %<br>100     | N<br>435   | %<br>100     | PR1          | 95%CI            | PR2              | 95%CI            |
| <b>Pregnancies</b>                       |                 |              |            |              |              |                  |                  |                  |
| <b>Any pregnancy</b>                     | <b>610</b>      | <b>61.93</b> | <b>362</b> | <b>83.22</b> | <b>1.13</b>  | <b>1.11–1.15</b> | <b>1.09 *</b>    | <b>1.05–1.13</b> |
| Never pregnant (reference)               | 375             | 38.07        | 73         | 16.78        | 1            |                  |                  |                  |
| 1 Pregnancy                              | 176             | 17.87        | 78         | 17.93        | 1.88         | 1.42–2.49        | 1.29             | 0.99–1.67        |
| <b>2 Pregnancies</b>                     | <b>245</b>      | <b>24.87</b> | <b>119</b> | <b>27.36</b> | <b>2.01</b>  | <b>1.55–2.59</b> | <b>1.41</b>      | <b>1.11–1.80</b> |
| <b>3 Pregnancies</b>                     | <b>107</b>      | <b>10.86</b> | <b>77</b>  | <b>17.70</b> | <b>2.57</b>  | <b>1.96–3.37</b> | <b>1.49</b>      | <b>1.16–1.92</b> |
| <b>4+ Pregnancies</b>                    | <b>82</b>       | <b>8.32</b>  | <b>88</b>  | <b>20.23</b> | <b>3.18</b>  | <b>2.46–4.10</b> | <b>1.69</b>      | <b>1.33–2.15</b> |
| <b>Oral contraceptives</b>               |                 |              |            |              |              |                  |                  |                  |
| Ever                                     | 732             | 74.31        | 235        | 54.02        | 0.55         | 0.47–0.64        | 0.93             | 0.79–1.09        |
| Never                                    | 247             | 25.08        | 197        | 45.29        | 1            |                  |                  |                  |
| Not specified                            | 6               | 0.61         | 3          | 0.69         |              |                  |                  |                  |
| <b>Pill years</b>                        |                 |              |            |              | 0.99         | 0.98–1.01        | 0.98 *           | 0.97–1.00        |
| Not specified                            | 253             | 25.68        | 200        | 45.98        |              |                  |                  |                  |
| <= 1 year                                | 82              | 8.32         | 34         | 7.82         | 1            |                  |                  |                  |
| 2–5 years                                | 172             | 17.46        | 62         | 14.25        | 0.90         | 0.63–1.29        | 1.23 *           | 0.88–1.72        |
| 6–10 years                               | 218             | 22.13        | 61         | 14.02        | 0.75         | 0.52–1.07        | 0.91 *           | 0.64–1.27        |
| 11–15 years                              | 139             | 14.11        | 37         | 8.50         | 0.72         | 0.48–1.07        | 0.74 *           | 0.51–1.08        |
| > 15 years                               | 121             | 12.28        | 41         | 9.42         | 0.86         | 0.59–1.27        | 0.85 *           | 0.59–1.22        |
| <b>Hormone replacement therapy (HRT)</b> |                 |              |            |              |              |                  |                  |                  |
| Ever                                     | 155             | 15.73        | 102        | 23.45        | 0.84         | 0.70–1.00        | 0.99             | 0.82–1.20        |
| Never                                    | 235             | 23.86        | 212        | 48.73        | 1            |                  |                  |                  |
| Oestrogenes                              | 40              | 4.06         | 29         | 6.67         | 0.89         | 0.66–1.19        | 0.98             | 0.71–1.36        |
| Gestagenes                               | 6               | 0.61         | 4          | 0.92         | 0.84         | 0.39–1.81        | 1.09             | 0.51–2.35        |
| Both                                     | 62              | 6.29         | 34         | 7.82         | 0.75         | 0.56–1.00        | 0.90             | 0.66–1.21        |
| Don't know                               | 47              | 4.77         | 35         | 8.05         | 0.90         | 0.69–1.18        | 1.09             | 0.84–1.40        |
| No information                           | 595             | 60.41        | 121        | 27.82        |              |                  |                  |                  |

*Note.* \* = log-binomial model did not converge; alternatively, the robust Poisson models were used.

## Electronic supplementary material

**Table 2.** Multivariate estimation of the prevalence ratio (PR) for venous edema (C3) and number of pregnancies or oral contraceptive use in the female population

| Risk factor                               | Control group 2 |              | C3         |              | Raw estimate  |                  | Adjust. estimate |                  |
|-------------------------------------------|-----------------|--------------|------------|--------------|---------------|------------------|------------------|------------------|
|                                           | N               | %            | N          | %            | PR1           | 95%CI            | PR2              | 95%CI            |
|                                           | 1135            | 100          | 256        | 100          |               |                  |                  |                  |
| <b>Pregnancies</b>                        |                 |              |            |              |               |                  |                  |                  |
| <b>Any Pregnancy</b>                      | <b>712</b>      | <b>62.73</b> | <b>207</b> | <b>80.86</b> | <b>1.20 *</b> | <b>1.14–1.26</b> | <b>1.07</b>      | <b>1.01–1.13</b> |
| Never pregnant (Reference)                | 423             | 37.27        | 49         | 19.14        | 1             |                  |                  |                  |
| 1 pregnancy                               | 202             | 17.80        | 39         | 15.23        | 1.56          | 1.05–2.30        | 0.98             | 0.68–1.42        |
| 2 pregnancies                             | 278             | 24.49        | 79         | 30.86        | 2.13          | 1.53–2.96        | 1.33             | 0.97–1.81        |
| 3 pregnancies                             | 130             | 11.45        | 41         | 16.01        | 2.31          | 1.59–3.36        | 1.24             | 0.87–1.77        |
| <b>4+ pregnancies</b>                     | <b>102</b>      | <b>8.99</b>  | <b>48</b>  | <b>18.75</b> | <b>3.08</b>   | <b>2.17–4.39</b> | <b>1.47</b>      | <b>1.06–2.06</b> |
| <b>Oral contraceptives</b>                |                 |              |            |              |               |                  |                  |                  |
| Ever                                      | 841             | 74.10        | 126        | 49.22        | 0.43          | 0.34–0.53        | 0.81             | 0.63–1.04        |
| Never (reference)                         | 286             | 25.20        | 126        | 49.22        | 1             |                  |                  |                  |
| Not specified                             | 8               | 0.70         | 4          | 1.56         |               |                  |                  |                  |
| <b>Pill Years</b>                         |                 |              |            |              | 1.00          | 0.98–1.03        | 0.99*            | 0.97–1.01        |
| Not specified                             | 294             | 25.90        | 130        | 50.78        |               |                  |                  |                  |
| <= 1 Year                                 | 89              | 7.84         | 17         | 6.64         | 1             |                  |                  |                  |
| 2–5 Years                                 | 198             | 17.44        | 34         | 13.28        | 0.91          | 0.54–1.56        | 1.26*            | 0.73–2.16        |
| 6–10 Years                                | 255             | 22.47        | 32         | 12.50        | 0.70          | 0.40–1.20        | 0.82*            | 0.48–1.43        |
| 11–15 Years                               | 161             | 14.18        | 15         | 5.86         | 0.53          | 0.28–1.02        | 0.55*            | 0.29–1.07        |
| > 15 Jahre                                | 138             | 12.16        | 28         | 10.94        | 1.05          | 0.61–1.83        | 1.00*            | 0.58–1.75        |
| <b>Hormone replacement Therapie (HRT)</b> |                 |              |            |              |               |                  |                  |                  |
| Ever                                      | 170             | 14.98        | 55         | 21.48        | 0.77          | 0.59–1.01        | 0.90             | 0.67–1.20        |
| Never                                     | 277             | 24.40        | 129        | 50.39        | 1             |                  |                  |                  |
| Oestrogenes                               | 42              | 3.70         | 20         | 7.81         | 1.02          | 0.69–1.50        | 1.11             | 0.73–1.67        |
| Gestagenes                                | 42              | 3.70         | 20         | 7.81         | 1.05          | 0.51–2.67        | 1.35             | 0.54–3.41        |
| Both                                      | 6               | 0.53         | 3          | 1.17         | 0.62          | 0.39–0.96        | 0.75             | 0.47–1.20        |
| Don't know                                | 52              | 4.58         | 15         | 5.86         | 0.70          | 0.44 1.13        | 0.83             | 0.51–1.34        |
| Not specified                             | 688             | 60.17        | 72         | 28.12        |               |                  |                  |                  |

*Note.* \* = log-binomial model did not converge; alternatively, the robust Poisson models were used.

## Electronic supplementary material

**Table 3.** Multivariate estimation of the prevalence ratio (PR) for severe CVI (C4–C6) and number of pregnancies in the female population

| Risk factor                | Control group 2 |              | C4–C6     |              | Raw estimate |                   | Adjust. estimate |                  |
|----------------------------|-----------------|--------------|-----------|--------------|--------------|-------------------|------------------|------------------|
|                            | N<br>1135       | %<br>100     | N<br>58   | %<br>100     | PR1          | 95%CI             | PR2              | 95%CI            |
| <b>Pregnancies</b>         |                 |              |           |              |              |                   |                  |                  |
| <b>Any pregnancies</b>     | <b>712</b>      | <b>62.73</b> | <b>50</b> | <b>86.21</b> | <b>1.36</b>  | <b>1.23–1.50</b>  | <b>1.14</b>      | <b>1.02–1.27</b> |
| Never pregnant             | 423             | 37.27        | 8         | 13.79        | 1            |                   |                  |                  |
| 1 pregnancy                | 202             | 17.80        | 10        | 17.24        | 2.54         | 2.02–6.35         | 1.27             | 0.53–3.04        |
| 2 pregnancies              | 278             | 24.49        | 13        | 22.41        | 2.41         | 1.01–5.73         | 1.32             | 0.59–2.96        |
| 3 pregnancies              | 130             | 11.45        | 11        | 18.97        | 4.20         | 1.72–10.24        | 1.80             | 0.74–4.38        |
| <b>4+ pregnancies</b>      | <b>102</b>      | <b>8.99</b>  | <b>16</b> | <b>13.6</b>  | <b>7.31</b>  | <b>3.20–16.65</b> | <b>2.28</b>      | <b>1.04–4.97</b> |
| <b>Oral contraceptives</b> |                 |              |           |              |              |                   |                  |                  |
| Ever                       | 841             | 74.10        | 20        | 34.48        | 0.41         | 0.34–0.49         | 0.81             | 0.65–1.01        |
| Never                      | 286             | 25.20        | 37        | 63.79        | 1            |                   | 1                |                  |
| Not specified              | 8               | 0.70         | 1         | 1.72         |              |                   |                  |                  |
| <b>Pill Years</b>          |                 |              |           |              | 0.98         | 0.91–1.05         | 0.97*            | 0.90–1.03        |
| <= 1 Year                  | 89              | 7.84         | 4         | 6.90         | 1            |                   |                  |                  |
| 2–5 Years                  | 198             | 17.44        | 4         | 6.90         | 0.46         | 0.12–1.80         | 0.86*            | 0.23–3.18        |
| 6–10 Years                 | 255             | 22.47        | 6         | 10.33        | 0.53         | 0.15–1.85         | 0.74*            | 0.25–2.23        |
| 11–15 Years                | 161             | 14.19        | 4         | 6.90         | 0.56         | 0.14–2.20         | 0.74*            | 0.21–2.63        |
| > 15 Years                 | 138             | 12.16        | 2         | 3.45         | 0.33         | 0.06–1.78         | 0.36*            | 0.07–1.82        |
| No Information             | 294             | 25.90        | 38        | 65.52        |              |                   |                  |                  |
| <b>HRT</b>                 |                 |              |           |              |              |                   |                  |                  |
| Ever                       | 170             | 14.98        | 14        | 24.14        | 0.65         | 0.36–1.16         | 1.04*            | 0.55–1.95        |
| Never                      | 277             | 24.41        | 37        | 63.79        | 1            |                   | 1                |                  |
| Oestrogenes                | 42              | 3.70         | 3         | 5.17         | 0.57         | 0.18–1.76         | 0.76*            | 0.25–2.30        |
| Gestagenes                 | 6               | 0.53         | 1         | 1.72         | 1.21         | 0.19–7.63         | 1.84*            | 0.40–8.58        |
| Both                       | 70              | 6.17         | 6         | 10.34        | 0.67         | 0.29–1.53         | 1.19*            | 0.51–2.77        |
| Don't know                 | 52              | 4.58         | 4         | 6.90         | 0.61         | 0.22–1.63         | 1.02             | 0.36–2.84        |
| Not specified              | 688             | 60.62        | 7         | 12.07        |              |                   |                  |                  |

*Note.* \* = log-binomial model did not converge; alternatively, the robust Poisson models were used.
